# Supplementary material for: CD70-restricted specific activation of TRAILR1 or TRAILR2 using scFv-targeted TRAIL mutants
Source: PubMed Central journal article supplement — Cell Death Dis. 2014 Jan 30;5(1):e1035–. doi: 10.1038/cddis.2013.555 (PMC4040681; doi:10.1038/cddis.2013.555), 2014-01-30
Supplement: cddis2013555x1.pdf [file cddis2013555x1.pdf]

Trebing et al., **CD70-restricted specific activation of TRAILR1 or TRAILR2 using scFv-targeted TRAIL mutants**

**Supplemental Figure1**

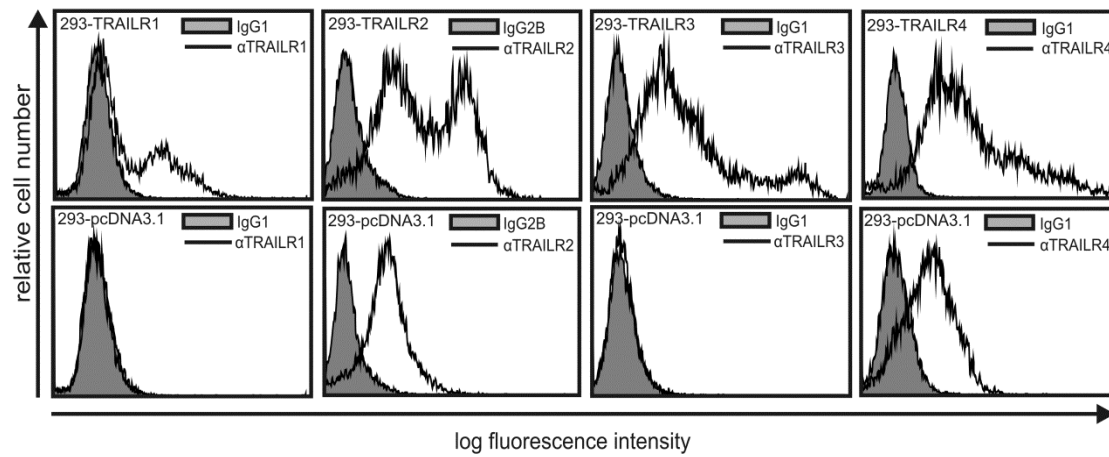

Hek293 cells were transiently transfected with expression constructs encoding the four types of cell bound TRAIL receptors or empty vector (pcDNA3.1). Next day, cells were analyzed by FACS for cell surface expression of the indicated TRAIL receptors.
